# Supplementary material
Source: PubMed Central journal article supplement (PMC3386882)
Supplement: 1201891109_pnas.201201891SI.pdf [file 1201891109_pnas.201201891SI.pdf]

# Supporting Information

Krubitzer and Seelke 10.1073/pnas.1201891109

**Table S1. Table of abbreviations**

| Abbreviation       | Description                                              |
|--------------------|----------------------------------------------------------|
| Genes and hormones |                                                          |
| BMP                | Bone morphogenic proteins                                |
| FGF                | Fibroblast growth factor                                 |
| FSH                | Follicle stimulating hormone                             |
| GnRH               | Gonadotropin releasing hormone                           |
| KO                 | Knock out                                                |
| LH                 | Lutenizing hormone                                       |
| mRNA               | Messenger RNA                                            |
| Anatomy            |                                                          |
| 3a                 | Brodmann's area 3a (somatosensory area)                  |
| 3b                 | Brodmann's area 3b (somatosensory area)                  |
| A1                 | Primary auditory area                                    |
| CL                 | Central lateral nucleus                                  |
| LIP/VIP            | Lateral intraparietal area/ventral intraparietal area    |
| LGN                | Lateral geniculate nucleus                               |
| M1                 | Primary motor area                                       |
| MG                 | Medial geniculate nucleus                                |
| NAcc               | Nucleus accumbens                                        |
| Pla (PO)           | Anterior pulvinar nucleus                                |
| PM                 | Parietal media area (also referred to at PP)             |
| PO                 | Parietal occipital area                                  |
| PP                 | Posterior parietal cortex (previously referred to as PM) |
| PV                 | Parietal ventral area                                    |
| R                  | Rostral auditory area                                    |
| S1                 | Primary somatosensory area                               |
| S2/PV              | Secondary somatosensory area/parietal ventral area       |
| SMA                | Supplementary motor area                                 |
| V1                 | Primary visual area                                      |
| V2                 | Secondary visual area                                    |
| V3                 | Tertiary visual area                                     |
| VL                 | Ventral lateral nucleus                                  |
| VP                 | Ventral posterior nucleus                                |
| VPi                | Ventral posterior inferior nucleus                       |
| VPs                | Ventral posterior superior nucleus                       |
